# Supplementary material for: A high-resolution bedrock map for the Antarctic Peninsula
Source: Copernicus journal article supplement (doi:10.5194/tc-8-1261-2014), 2014-07-18
Supplement: Supplementary file 2 [file tc-8-1261-2014-supplement.zip]

# Supplementary Online Material:

## A high-resolution bedrock map for the Antarctic Peninsula

M. Huss<sup>1,2</sup> and D. Farinotti<sup>3</sup>

<sup>1</sup> Laboratory of Hydraulics, Hydrology and Glaciology (VAW), ETH Zurich, 8093 Zurich, Switzerland

<sup>2</sup> Department of Geosciences, University of Fribourg, 1700 Fribourg, Switzerland

<sup>3</sup> German Research Centre for Geosciences (GFZ), Telegrafenberg, 14473 Potsdam, Germany

### (1) Gridded bedrock, thickness and uncertainty at 100 m resolution:

- **bedrock.zip** : Calculated bedrock topography of the Antarctic Peninsula north of 70°S in GeoTIFF format (unit: *m a.s.l.*)
- **thickness.zip** : Calculated ice thickness in GeoTIFF format (unit: *m*)
- **uncertainty.zip** : Estimated uncertainty in GeoTIFF format (unit: *m*)

For details on the GeoTIFF format visit, e.g., <http://www.remotesensing.org/geotiff/spec/geotiffhome.html>

### Spatial resolution, coverage, coordinate system

Spatial resolution: 100 m

Coverage: 63°S–70°S, 55°W–70°W

Projection: WGS84 Antarctic Polar Sterographic, Standard Parallel –71 °S

### Download in alternative data formats

Due to space constraints, the SOM of The Cryosphere only provides a compressed GeoTIFF format. Alternative data formats (NetCDF, ASCII text) are provided here:

[http://people.ee.ethz.ch/~mhuss/antarctic\\_peninsula/](http://people.ee.ethz.ch/~mhuss/antarctic_peninsula/)

### Reference

Huss, M. and Farinotti, D. (2014). A high-resolution bedrock map for the Antarctic Peninsula. The Cryosphere, ??? , doi: 10.5194/tcd-8-1191-2014.

### (2) Supplementary figures for estimated uncertainty over the model domain:

- **uncertainty\_absolute.pdf** : Estimated absolute uncertainty over the entire model domain referring to the  $1\sigma$ -level.(unit: *m*).
- **uncertainty\_relative.pdf** : Estimated relative uncertainty (unit: *%*)
