# Supplementary material for: A high-resolution bedrock map for the Antarctic Peninsula
Source: Copernicus journal article supplement (doi:10.5194/tc-8-1261-2014), 2014-07-18
Supplement: Supplementary file 4 [file tc-8-1261-2014-supplement.zip]

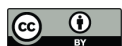

## *Supplement of*

# **A high-resolution bedrock map for the Antarctic Peninsula**

**M. Huss and D. Farinotti**

*Correspondence to:* M. Huss ([huss@vaw.baug.ethz.ch](mailto:huss@vaw.baug.ethz.ch))

- Supplement-Cover-Letter.pdf
- SOM
  - SOM\_text.pdf
  - bedrock.zip
  - thickness.zip
  - uncertainty.zip
  - uncertainty\_absolute.pdf
  - uncertainty\_relative.pdf
