# Supplementary figures and images for: A high-resolution bedrock map for the Antarctic Peninsula
Source: Copernicus journal article supplement (doi:10.5194/tc-8-1261-2014), 2014-07-18

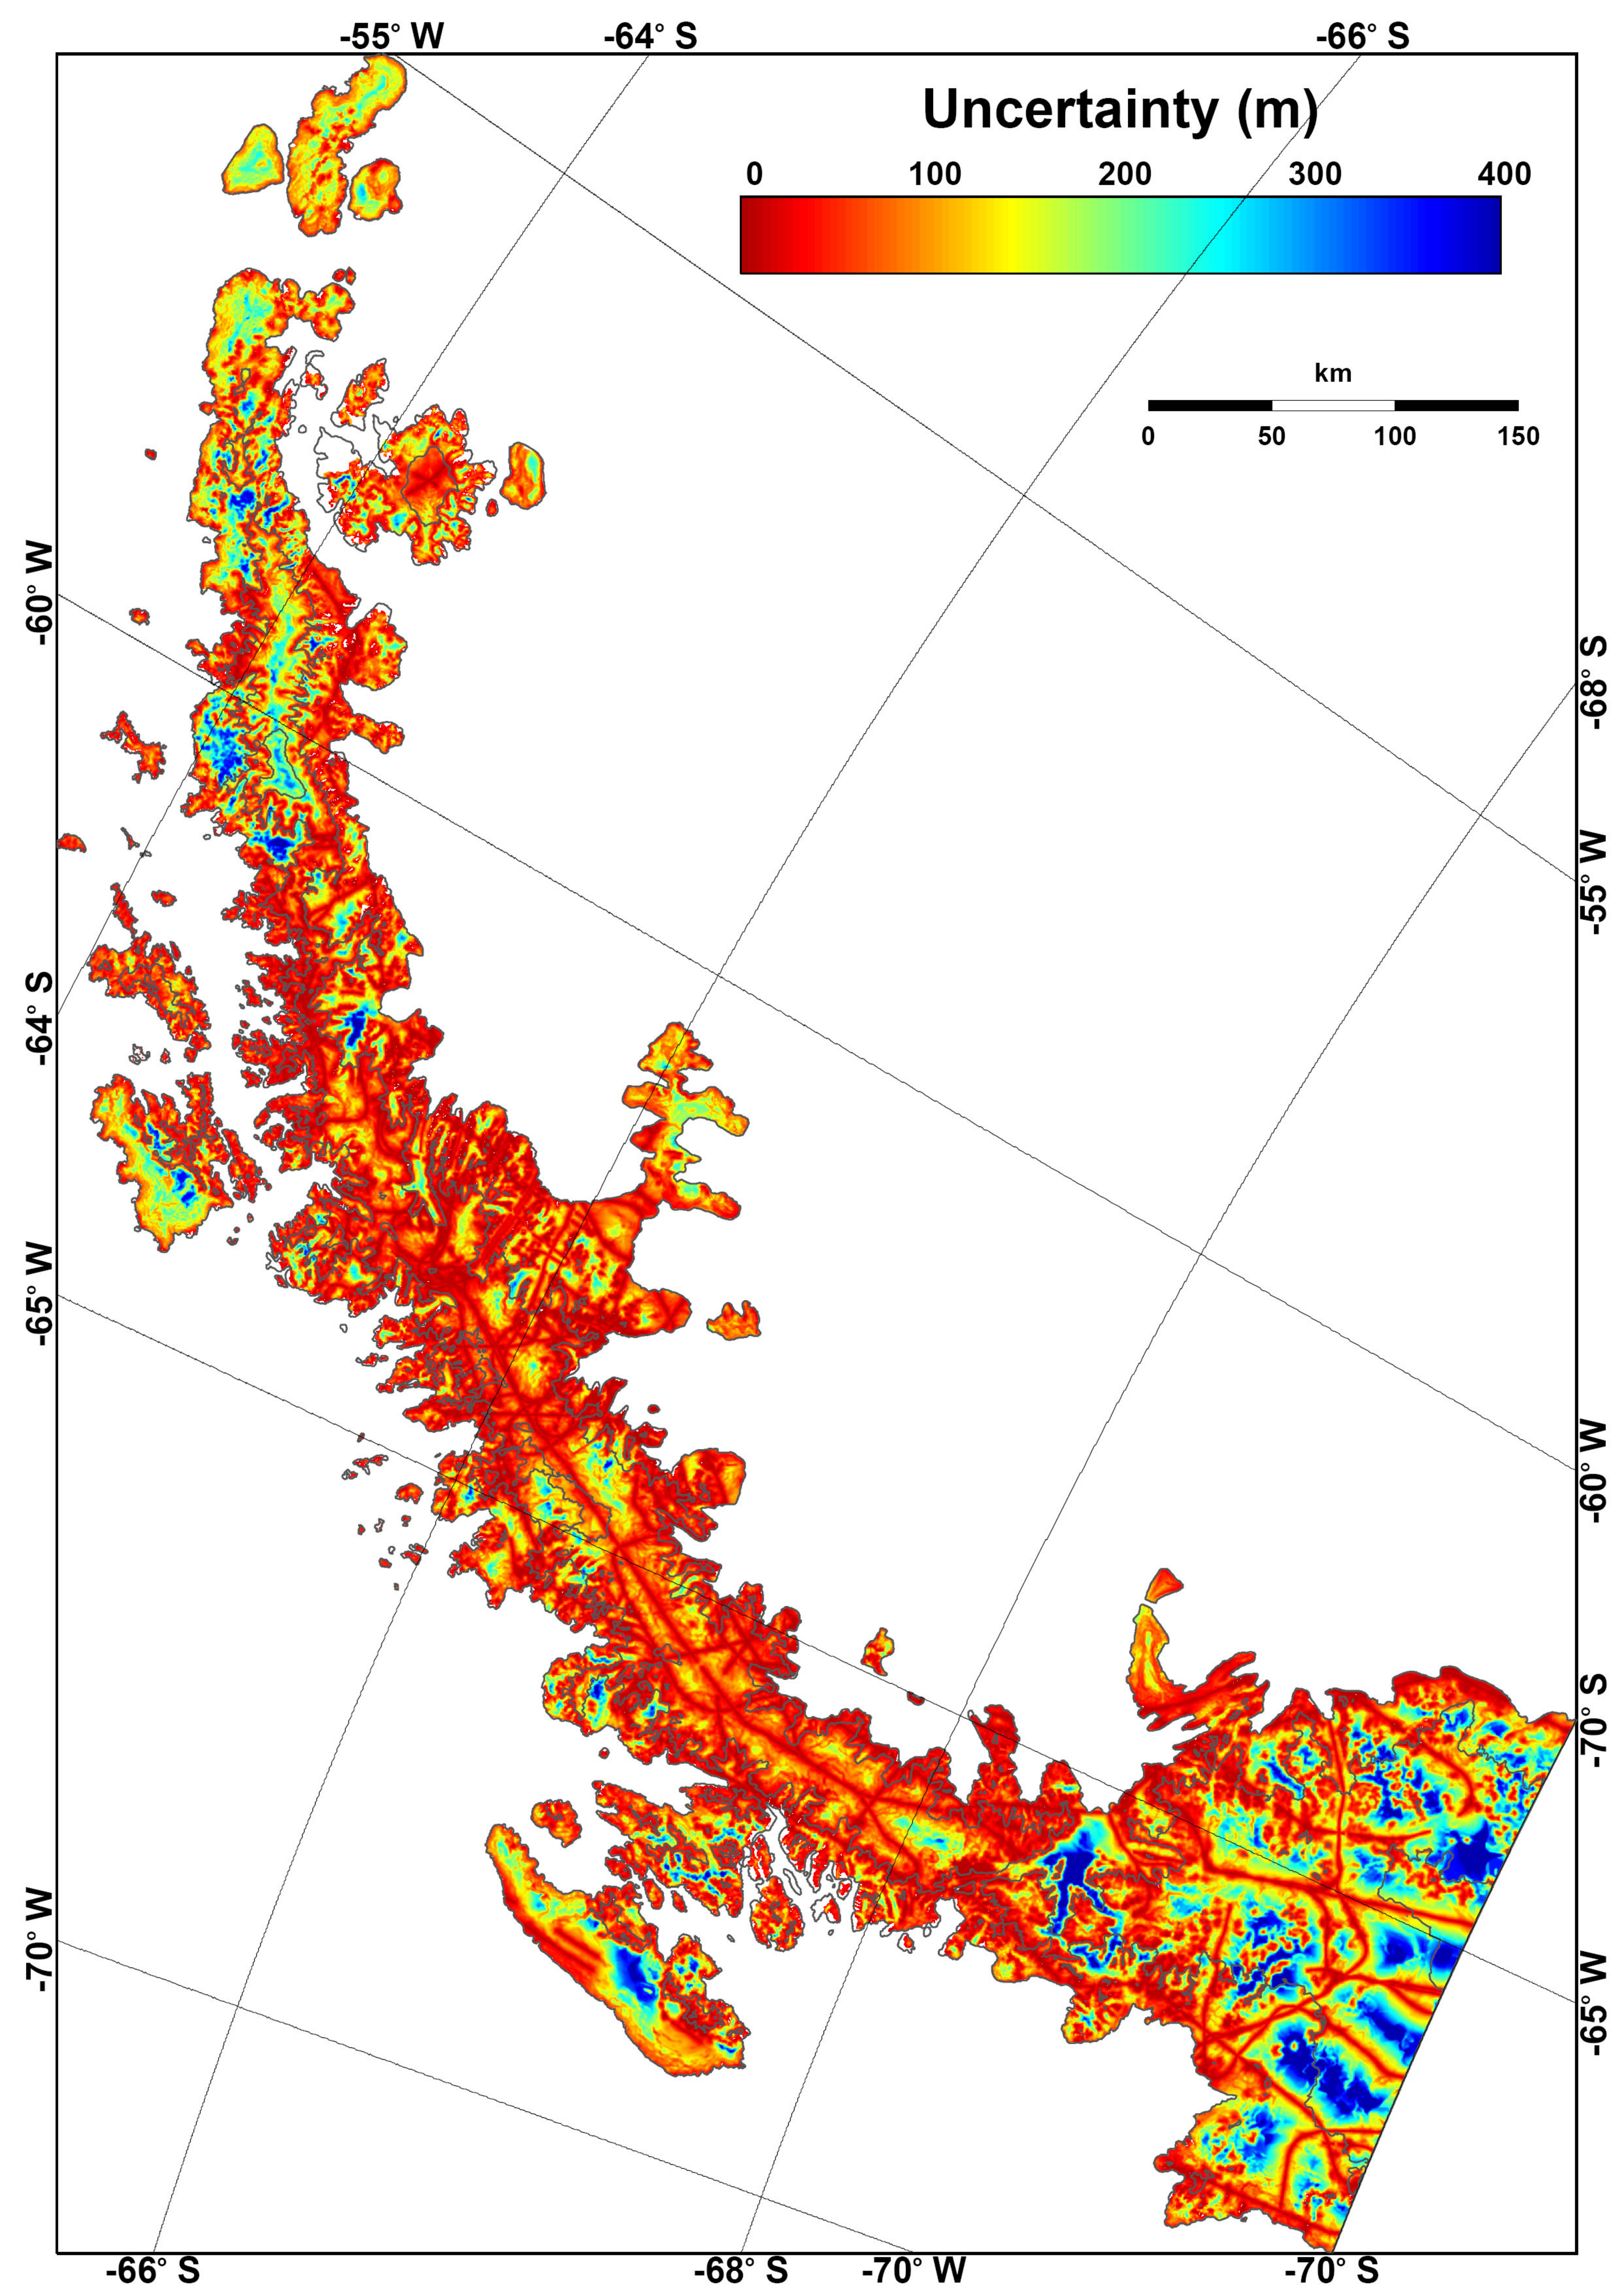

Supplement: Supplementary file 1 [file tc-8-1261-2014-supplement.zip]

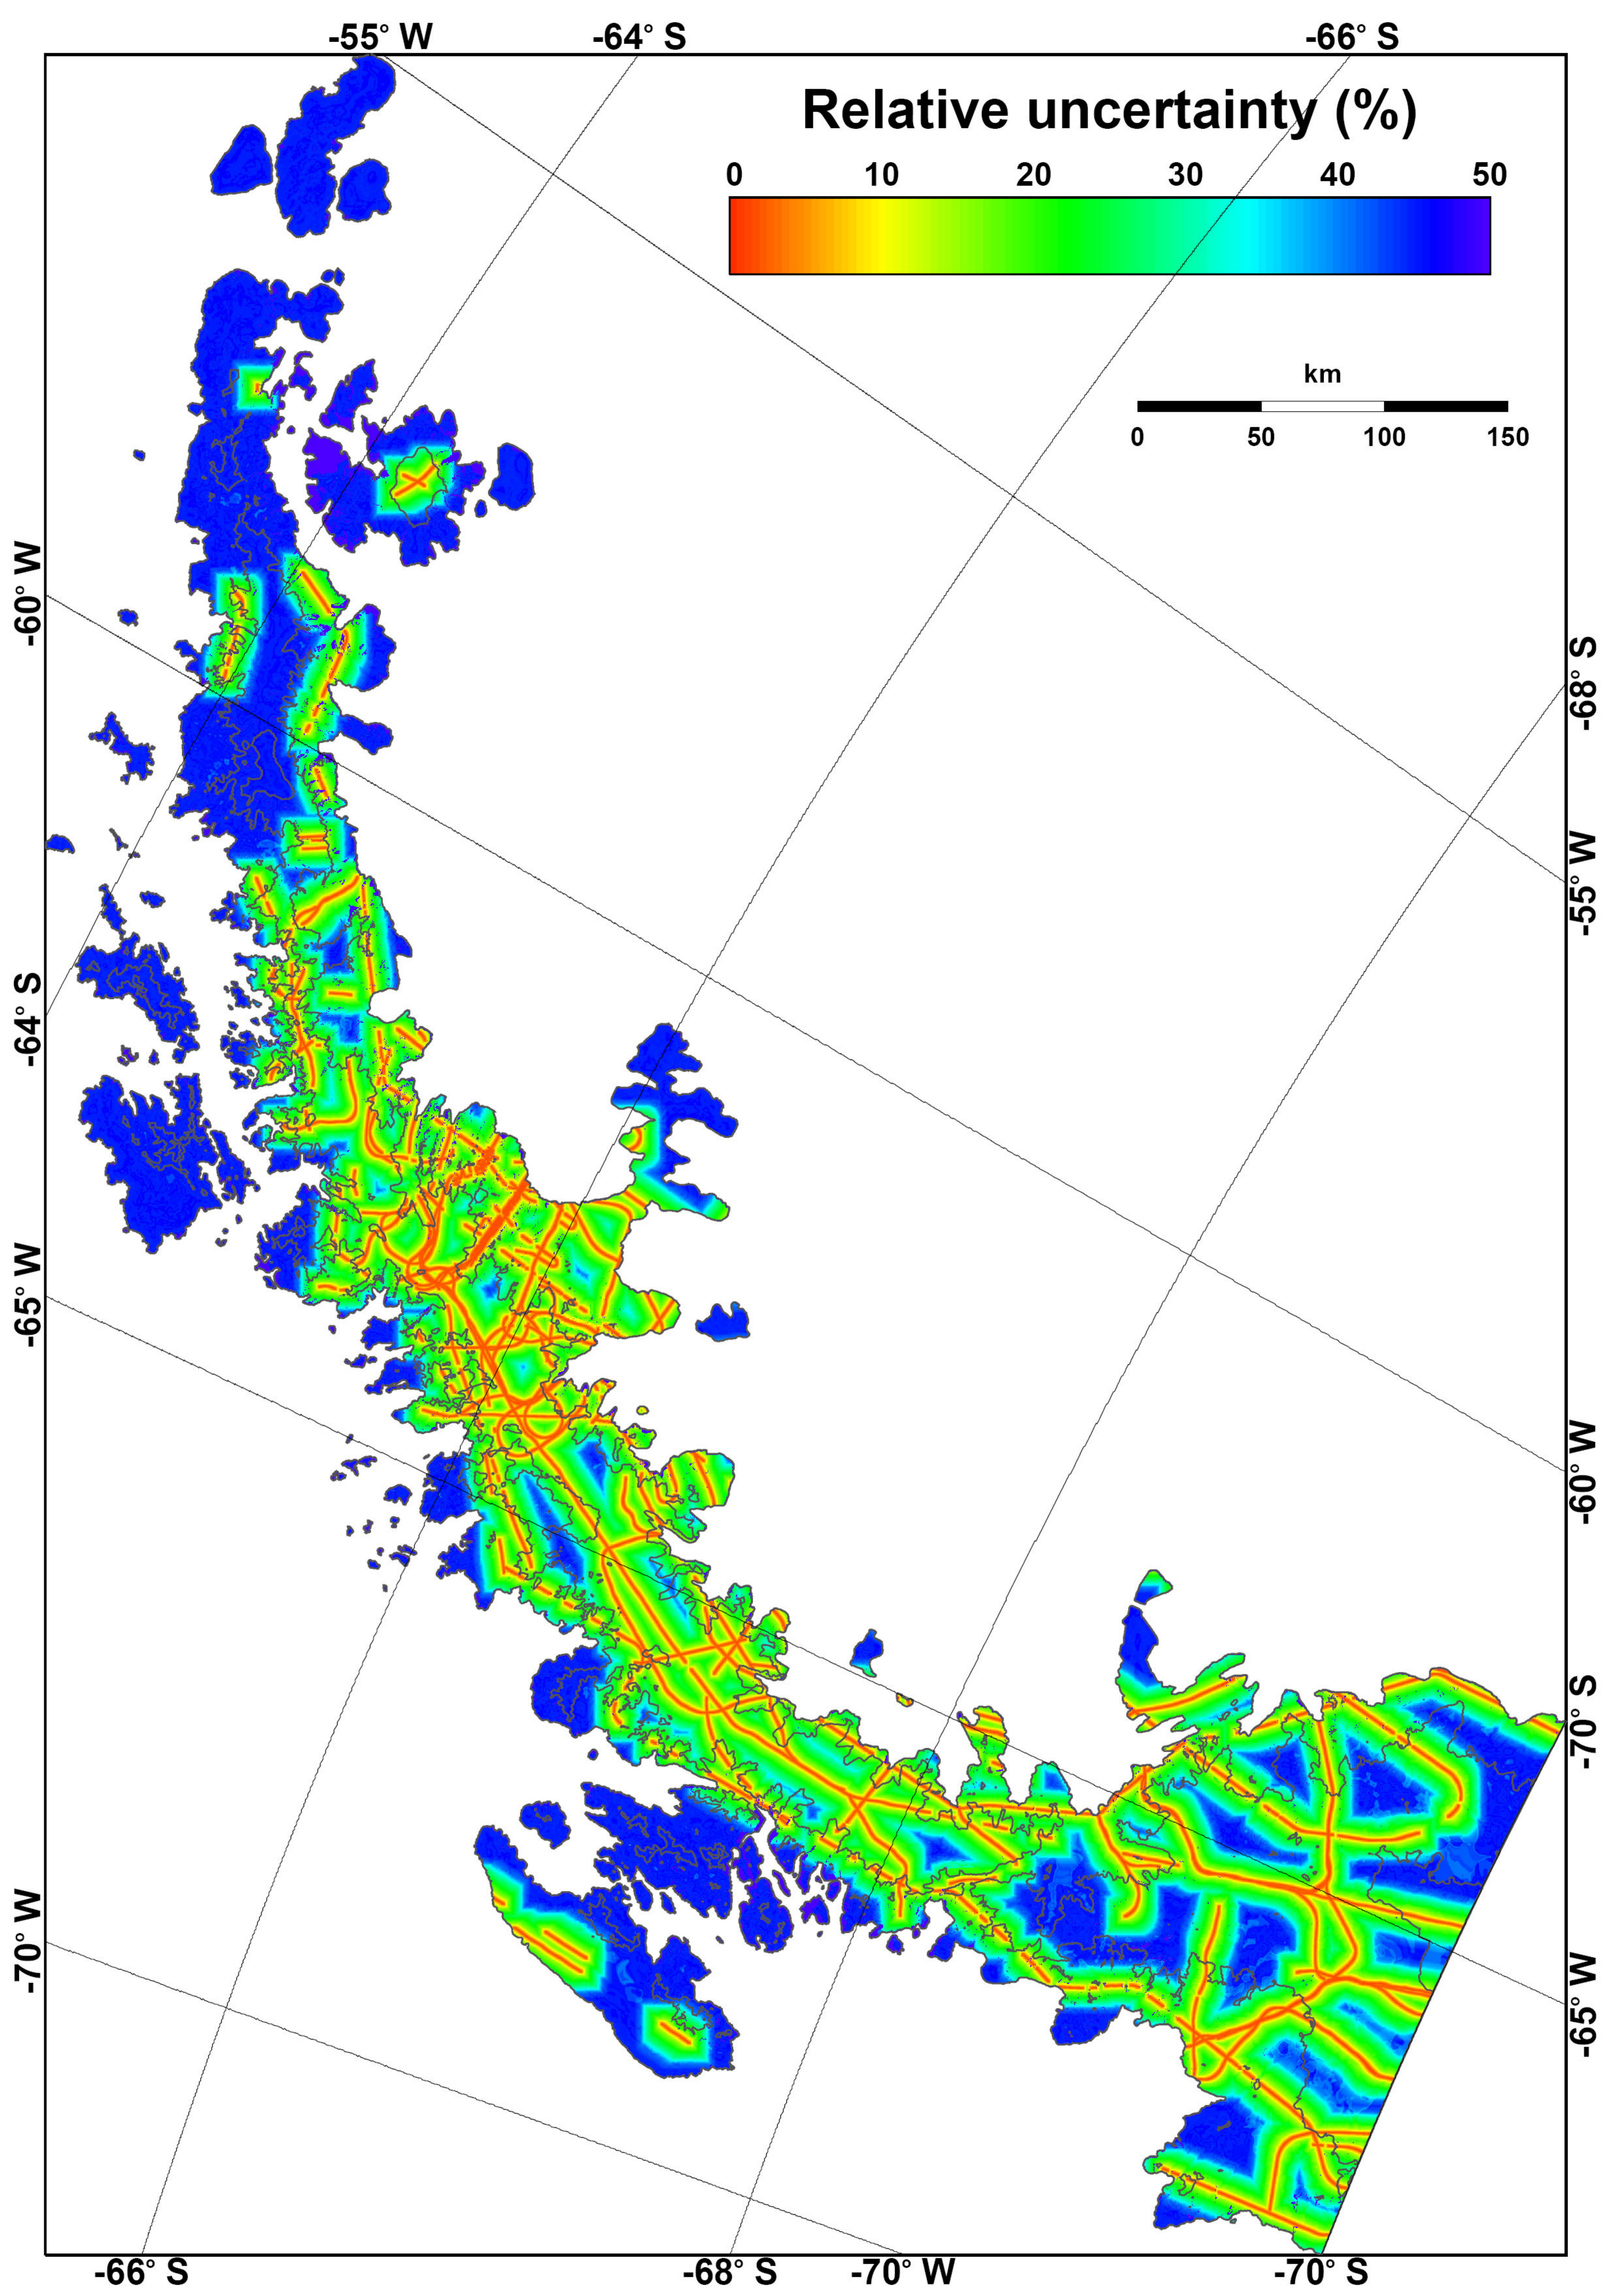

Supplement: Supplementary file 3 [file tc-8-1261-2014-supplement.zip]
